# Supplementary material for: A High-Performance Thin-Layer Chromatographic Method for the Simultaneous Determination of Curcumin I, Curcumin II and Curcumin III in Curcuma longa and Herbal Formulation
Source: MDPI journal article supplement (doi:10.3390/separations9040094), 2022-04-10
Supplement: s1 [file s1]

# **A high performance thin layer chromatographic method for the simultaneous determination of curcumin I, curcumin II and curcumin III in *Curcuma longa* and herbal formulation**

Maged S. Abdel-Kader <sup>1,2\*</sup>, Ayman A. Salkini <sup>1</sup>, Prawez Alam<sup>1</sup>, Khaled A. Alshahrni<sup>1</sup>, Ahmed I. Foudah <sup>1</sup> and Mohammed H. Alqarni <sup>1</sup>

<sup>1</sup> Department of Pharmacognosy, College of Pharmacy, Prince Sattam Bin Abdulaziz University, P.O. Box 173, Al-Kharj 11942, Saudi Arabia mpharm101@hotmail.com, m.youssef@psau.edu.sa, m.salkini@psau.edu.sa, p.alam@psau.edu.sa, Ph.khaled1997@gmail.com, a.foudah@psau.edu.sa, m.alqarni@psau.edu.sa

<sup>2</sup> Department of Pharmacognosy, Faculty of Pharmacy, Alexandria University, Alexandria 21215, Egypt.

\*Correspondence: mpharm101@hotmail.com ; Tel.: (+00966545539145)

### Characterization of Curcumins

**Curcumin I:** Yellow powder, m.p. 183 0C; UV  $\lambda_{\text{max}}$  (MeOH) 263, 431 nm;  $^1\text{H}$  NMR ( $\delta$ ,  $\text{CDCl}_3$ )(Figure S1): 5.98 (s, H-1), 6.48 (d,  $J$ = 16 Hz, H-3, 3'), 7.58 (d,  $J$ = 16 Hz, H-4, 4'), 7.05 (bs, H-6, 6'), 6.92 (d,  $J$ = 8.2Hz, H-9, 9'), 7.11 (bd,  $J$ = 8.2Hz, H-10, 10'), 3.98 (s, 2 X  $\text{OCH}_3$ ).  $^{13}\text{C}$  NMR ( $\delta$ ,  $\text{CDCl}_3$ )(Figure S2): 100.81 (C-1), 183.52 (C-2,2'), 121.76 (C-3,3'), 140.60 (C-4,4'), 127.69 (C-5,5'), 109.65 (C-6,6'), 147.87 (C-7,7'), 146.81 (C-8,8'), 114.85 (C-9,9'), 122.90 (C-10,10'), 55.84 ( $\text{OCH}_3$ ) and Table 2. HRESI-MS:  $m/z$  367.1188 (Calc. 367.1182) [ $\text{M}^+-1$ ], 369.1328 (Calc. 369.1338) [ $\text{M}^++1$ ], 391.1147 (Calc. 391.1158) [ $\text{M}^++\text{Na}$ ] (Figure S1).

**Curcumin II:** Yellow powder, m.p. 169 0C; UV  $\lambda_{\text{max}}$  (MeOH) 251, 423 nm;  $^1\text{H}$  NMR ( $\delta$ ,  $\text{CD}_3\text{OD}$ )(Figure S1): 5.98 (s, H-1), 6.57 (d,  $J$ = 16 Hz, H-3, 3'), 7.55 (d,  $J$ = 16 Hz, H-4, 4'), 7.19 (bs, H-6), 7.46 (d,  $J$ = 7.5 Hz. H-6', H10'), 6.80 (bd,  $J$ = 7.5 Hz H-7', H9', H-9), 7.08 (d,  $J$ =7.0 Hz, H-10), 3.83 (s,  $\text{OCH}_3$ ) and Table 1.  $^{13}\text{C}$  NMR ( $\delta$ ,  $\text{CD}_3\text{OD}$ )(Figure S2): 102.41 (C-1), 185.05 (C-2), 184.85 (C-2'), 122.43 (C-3), 122.16 C-3'), 142.28 (C-4), 142.05 (C-4'), 128.75 (C-5), 128.16 (C-5'), 111.88 (C-6), 131.35 (C-6', 10'), 149.57(C-7), 115.50 (C-7', C-9'), 150.63 (C-8), 161.27 (C-8'), 116.74 (C-9), 124.29 (C-10), 56.04 ( $\text{OCH}_3$ ). HRESI-MS:  $m/z$  337.1084 (Calc. 337.1076) [ $\text{M}^+-1$ ], 339.1226 (Calc. 339.1232) [ $\text{M}^++1$ ], 361.1043 (Calc. 361.1052) [ $\text{M}^++\text{Na}$ ] (Figure S2).

**Curcumin III:** Yellow powder, m.p. 173 0C; UV  $\lambda_{\text{max}}$  (MeOH) 248, 418 nm;  $^1\text{H}$  NMR ( $\delta$ ,  $\text{CD}_3\text{OD}$ )(Figure S1): 5.98 (s, H-1), 6.58 (d,  $J$ = 16 Hz, H-3, 3'), 7.56 (d,  $J$ = 16 Hz, H-4, 4'), 7.47 (d,  $J$ = 8.2 Hz, H-6, 6', 10, 10'), 6.80 (d,  $J$ = 8.2Hz, H-7, 7', 9, 9').  $^{13}\text{C}$  NMR ( $\delta$ ,  $\text{CD}_3\text{OD}$ )(Figure S2): 102.23 (C-1), 185.00 (C-2,2'), 122.15 (C-3,3'), 142.04 (C-4,4'), 128.17 (C-5,5'), 131.34 (C-6,6',10,10'), 117.07 (C-7,7',9,9'), 161.26 (C-8,8'). HRESI-MS:  $m/z$  307.0977 (Calc. 307.0970) [ $\text{M}^+-1$ ], 309.1120 (Calc. 309.1127) [ $\text{M}^++1$ ], 331.0938 (Calc. 331.0946) [ $\text{M}^++\text{Na}$ ] (Figure S3).

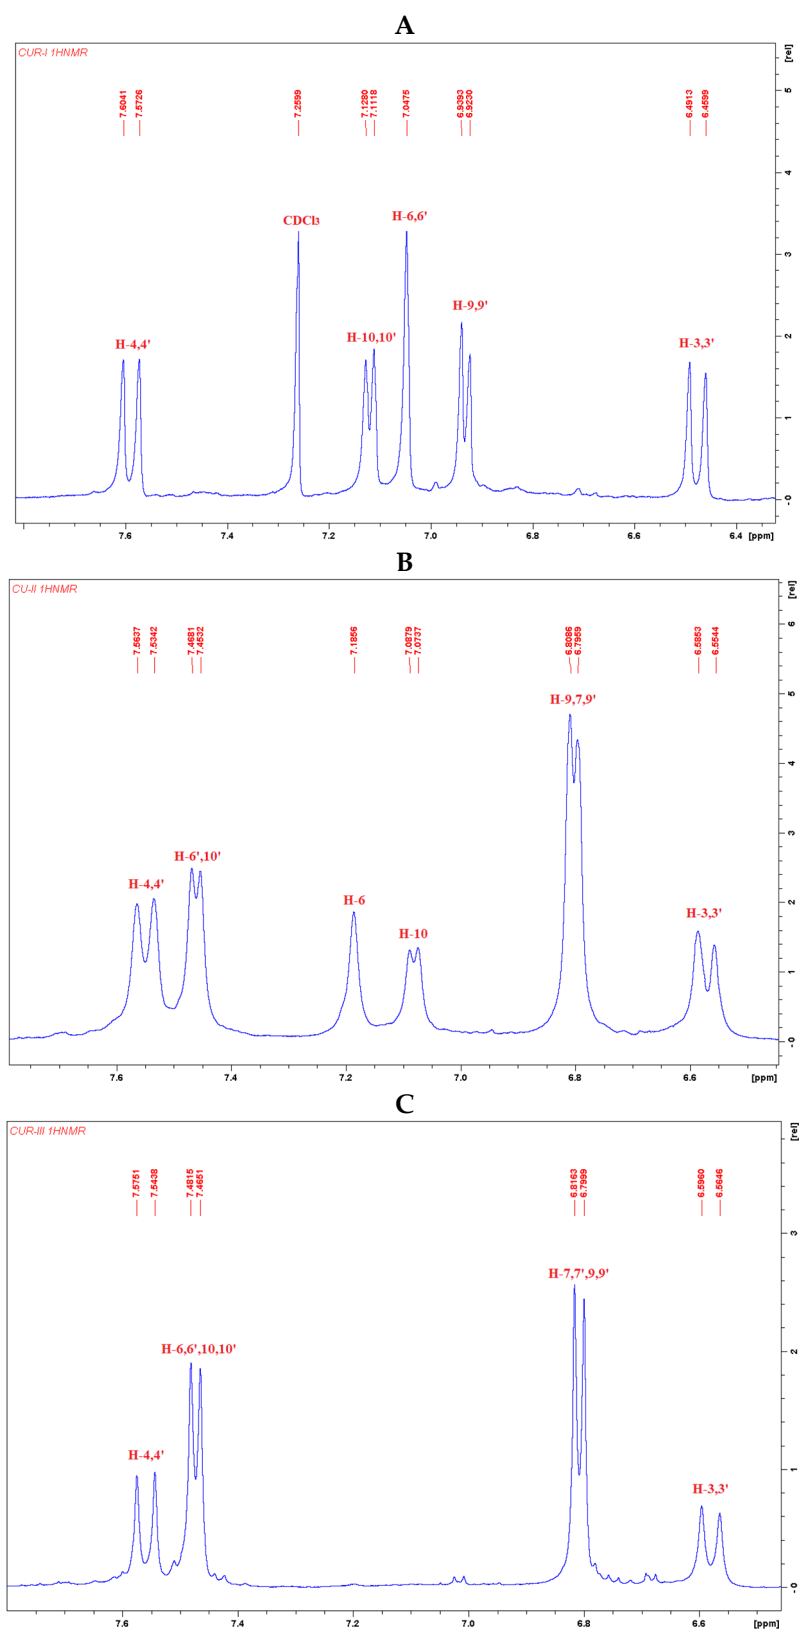

**Figure S1.** <sup>1</sup>H NMR of the aromatic protons of Curcumins I-III (A-C).

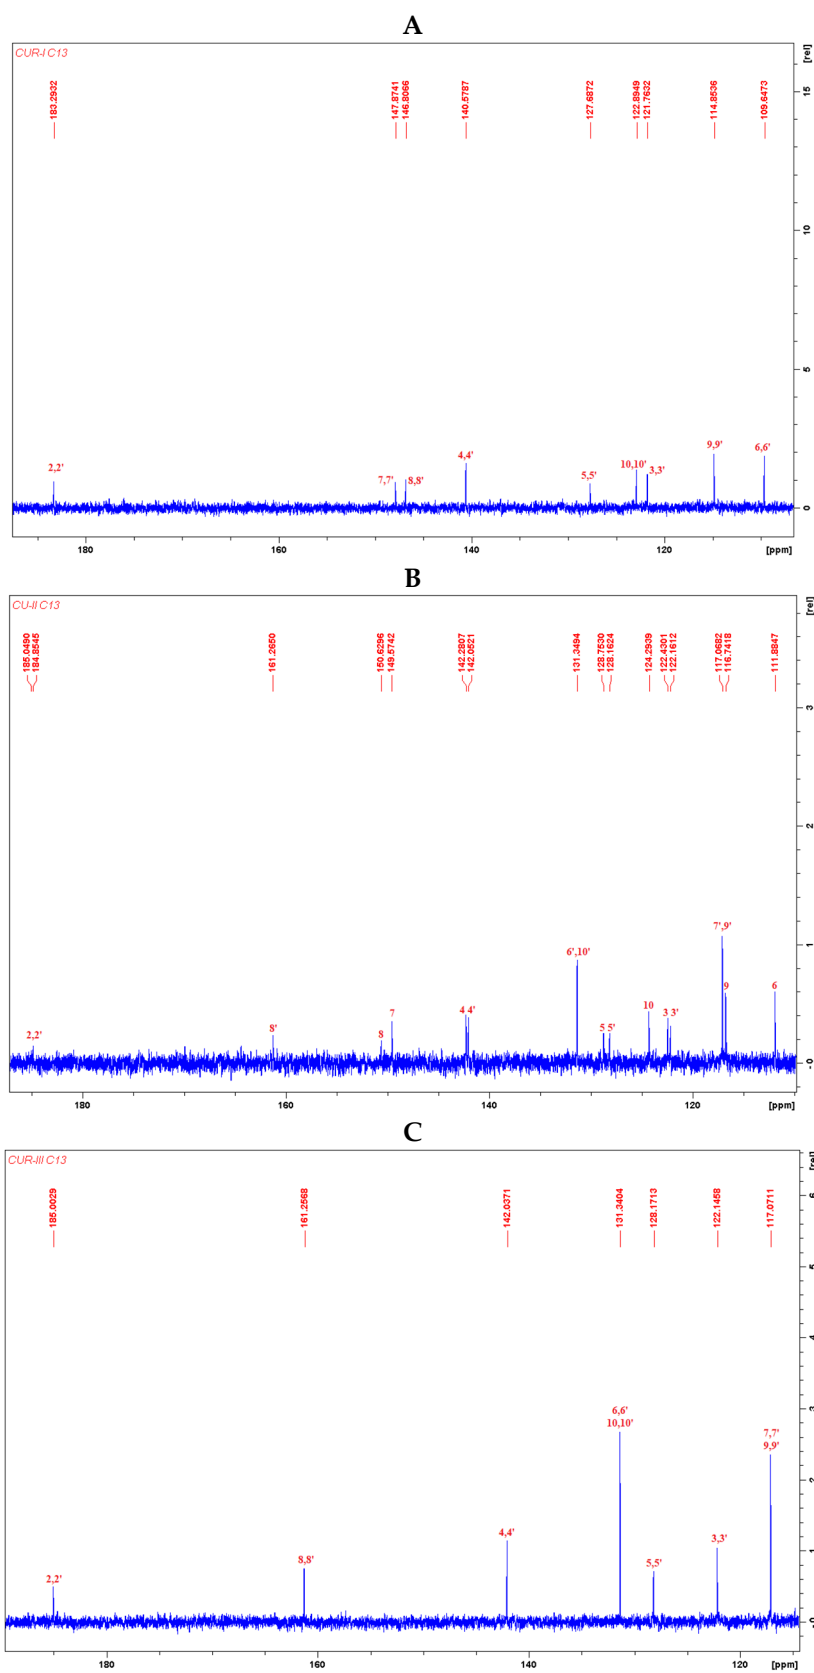

**Figure S2.**  $^{13}\text{C}$ NMR of the aromatic carbons of Curcumins I-III (A-C).

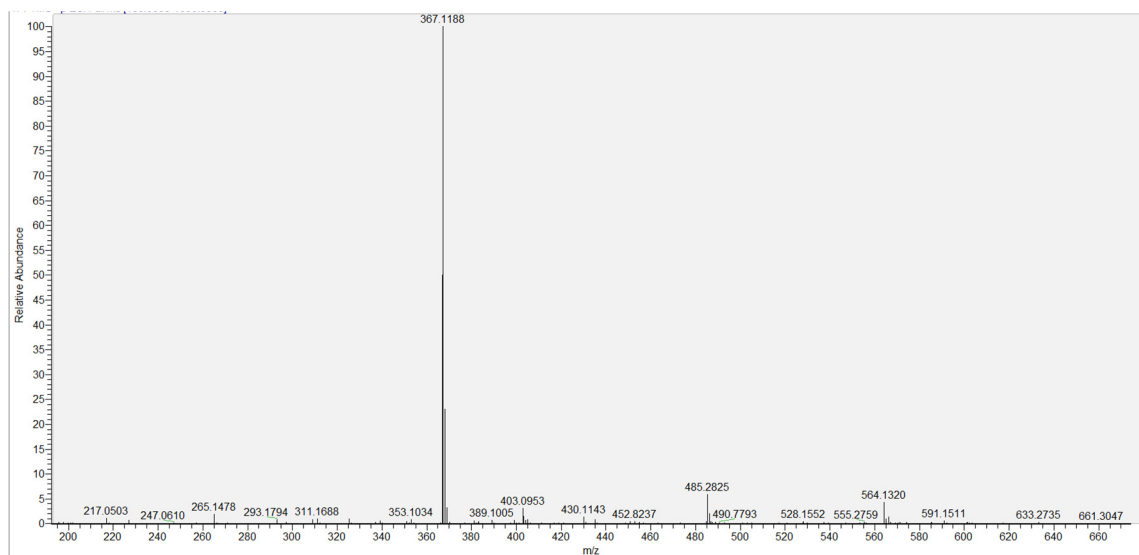

**A**

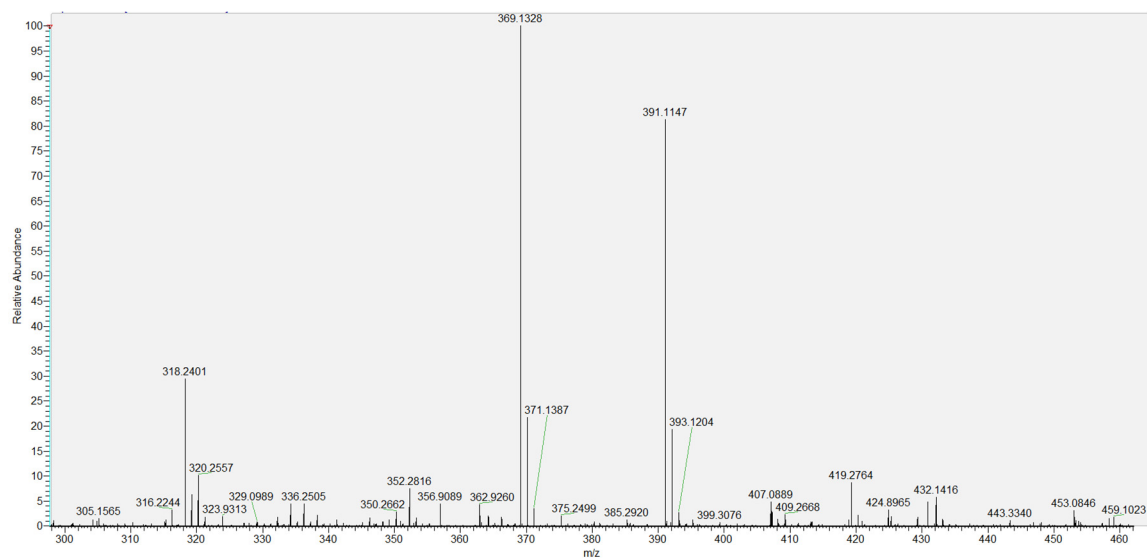

**B**

**Figure S3.** Mass spectra of Curcumin I (A: Negative Mode B: Positive Mode).

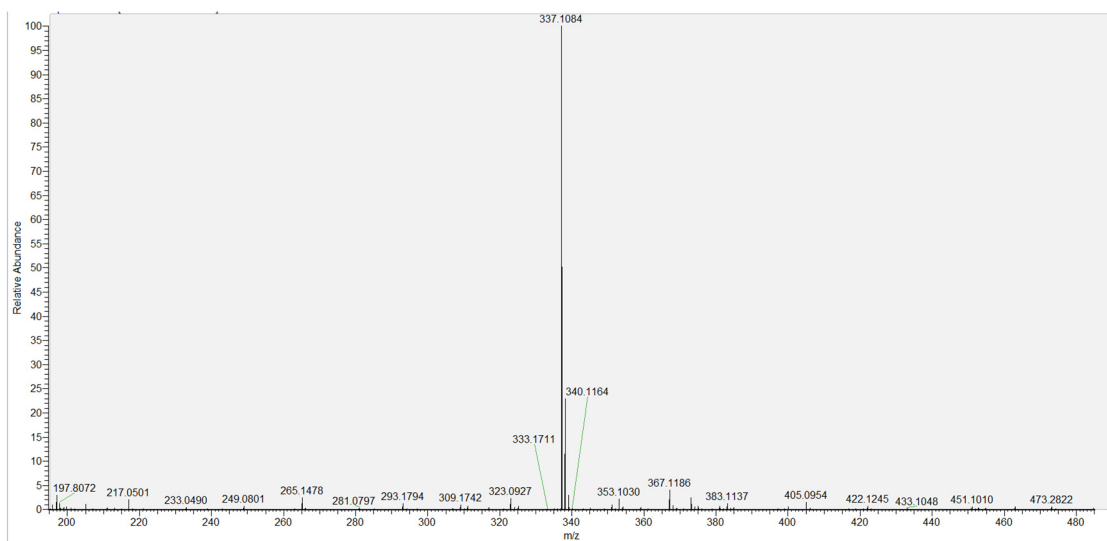

**A**

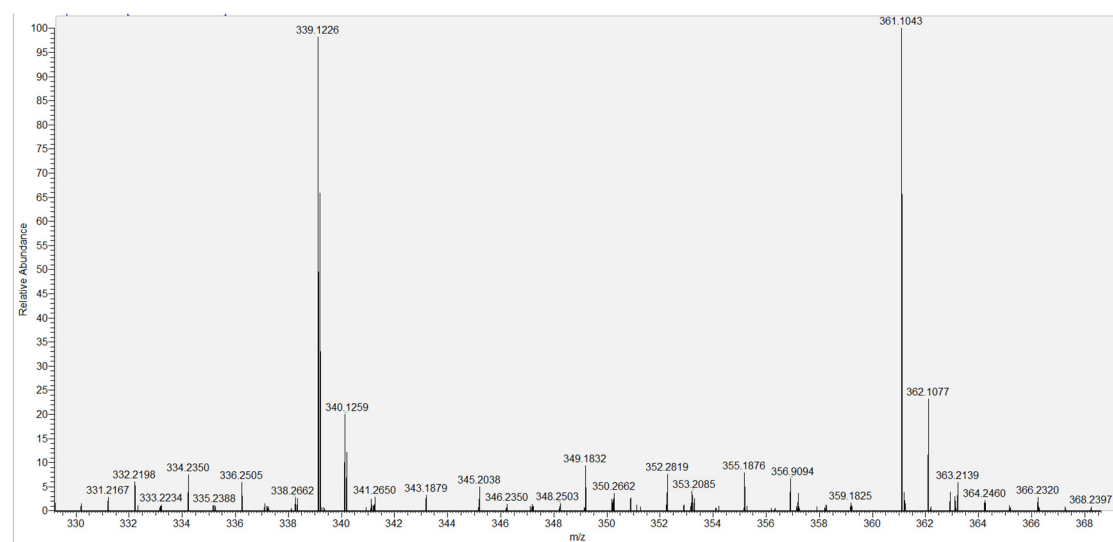

**B**

**Figure S4.** Mass spectra of Curcumin II (A: Negative Mode B: Positive Mode).

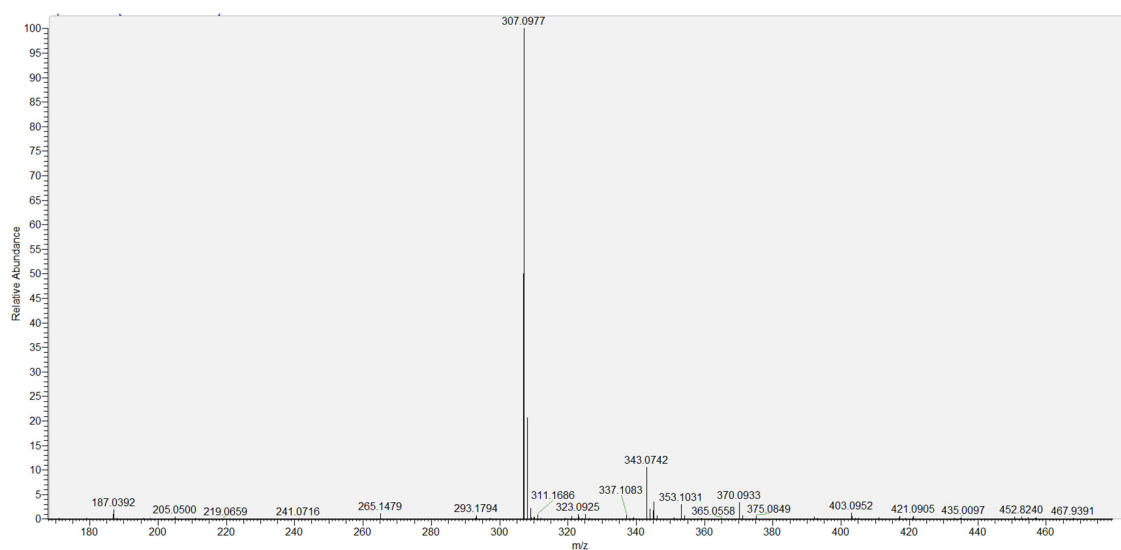

**A**

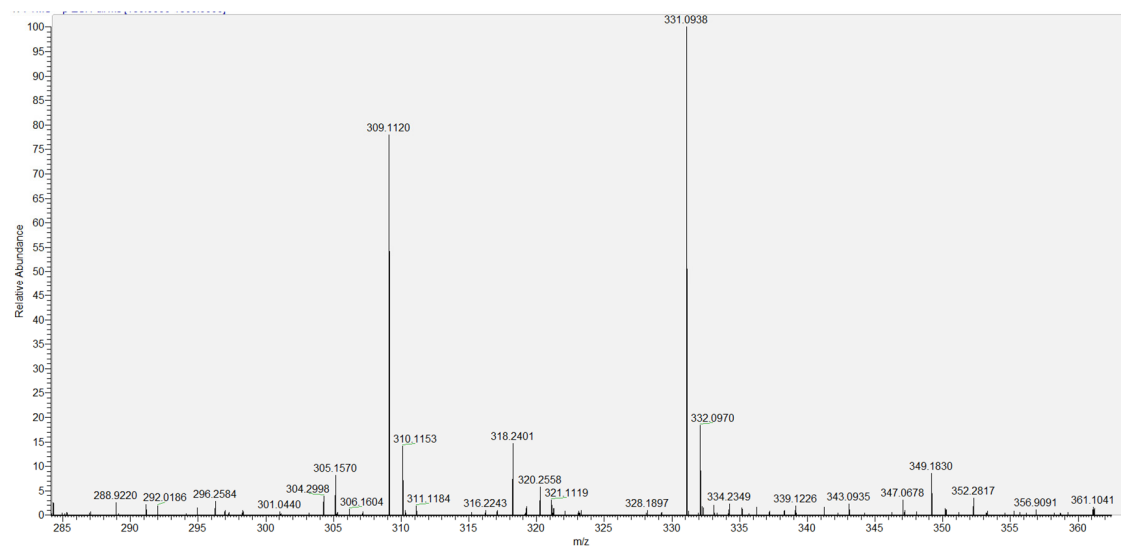

**B**

**Figure S5.** Mass spectra of Curcumin III (A: Negative Mode B: Positive Mode).

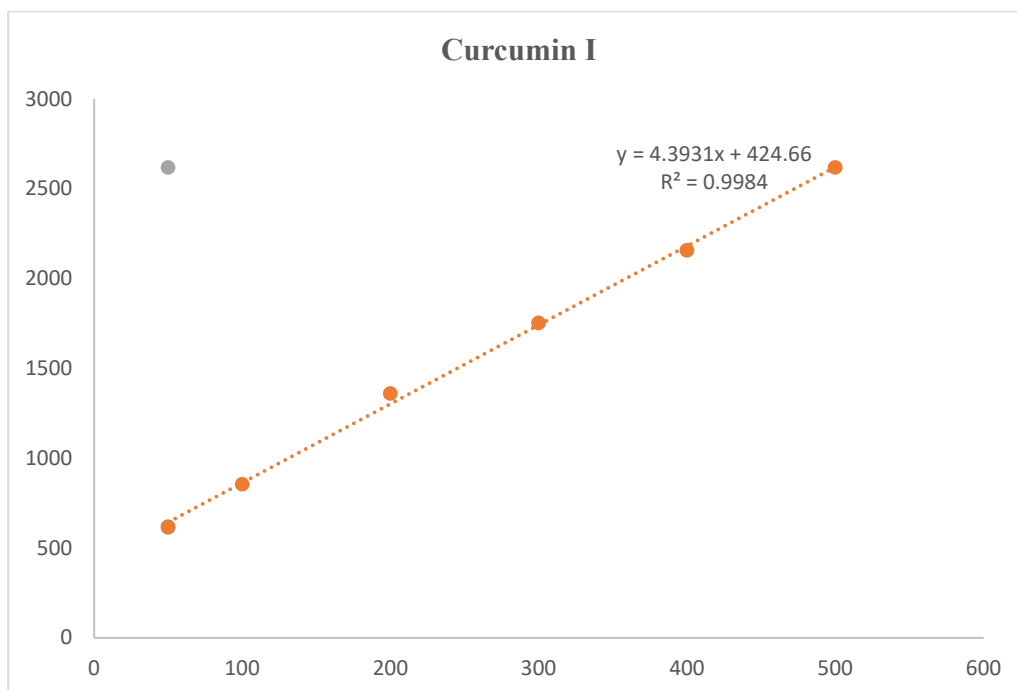

**Figure S6.** Calibration curve of curcumin I.

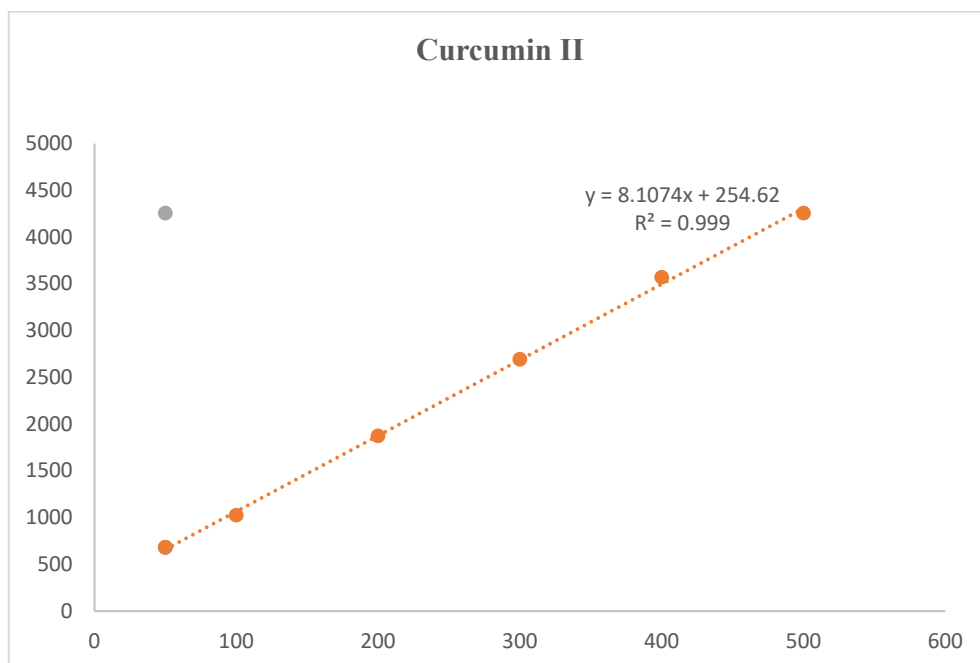

**Figure S7.** Calibration curve of curcumin II.



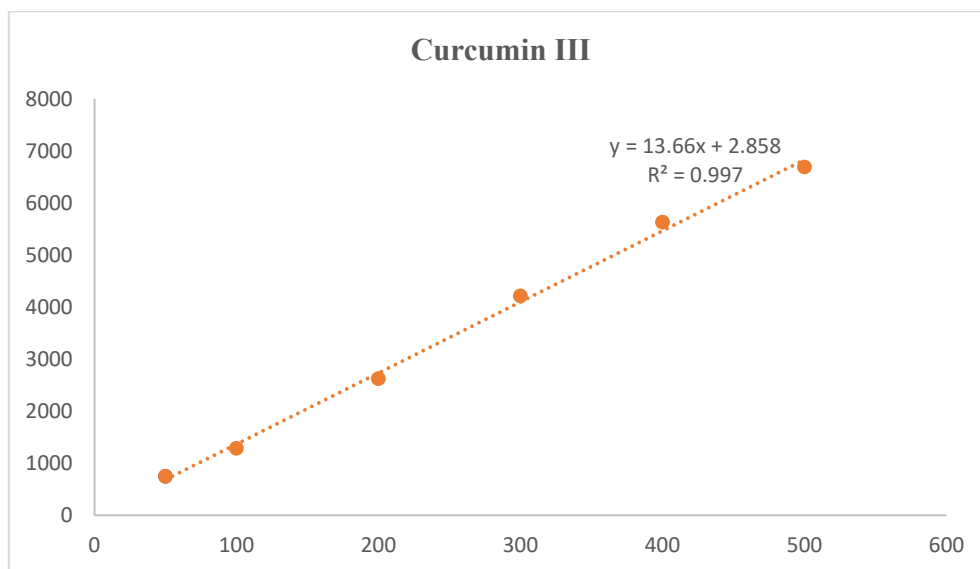

**Figure S8.** Calibration curve of curcumin III.

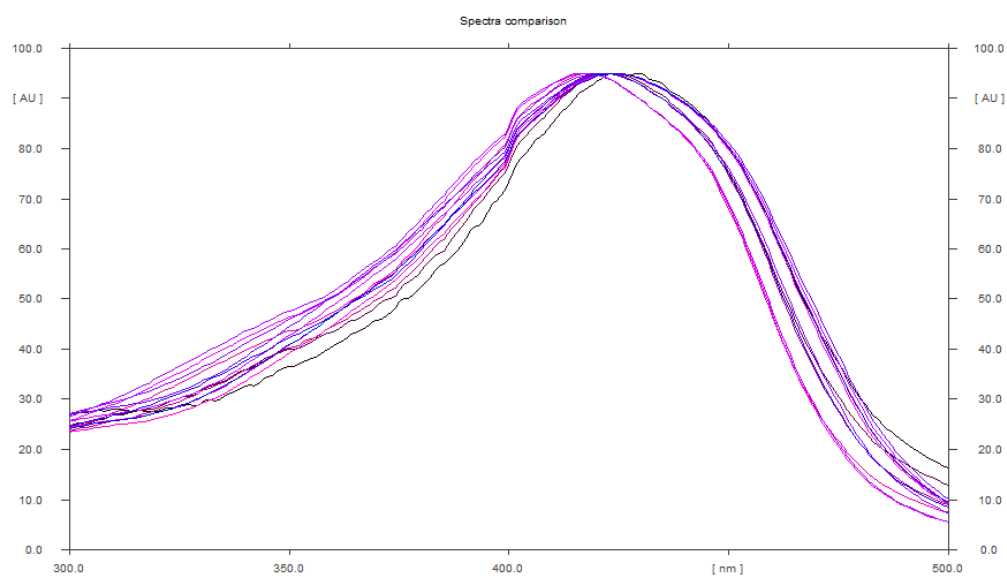

**Figure S9:** Overlay UV absorption spectra of curcumins I-III and corresponding spots in *C. longa* extracts and formulations.
